# Supplementary material for: The mixed-polarity benefit of stereopsis arises in early visual cortex
Source: PubMed Central journal article supplement — J Vis. 2019 Feb 19;19(2):9. doi: 10.1167/19.2.9 (PMC6380879; doi:10.1167/19.2.9), 2019-02-19
Supplement: jovi-19-02-11_s02.pdf [file jovi-19-02-11_s02.pdf]

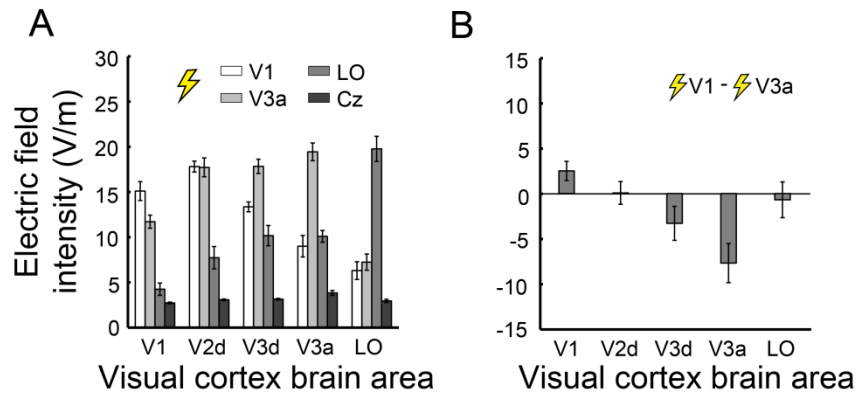

**Fig. S2 A)** Mean simulated electric field intensity in functional areas of the visual cortex for stimulation over V1, V3a, LO and Cz. Error bars depict one standard deviation. **B)** Mean contrast of simulated electric field intensity for stimulation over V1 and V3a. Error bars depict one standard deviation. Both stimulation over V1 and V3a produced comparable stimulation over early visual areas outside V1 e.g. V2d, however only V1 stimulation produced significant changes in behavior. This contrast acts as an estimate of behaviorally meaningful stimulation.
