# Supplementary material for: The mixed-polarity benefit of stereopsis arises in early visual cortex
Source: PubMed Central journal article supplement — J Vis. 2019 Feb 19;19(2):9. doi: 10.1167/19.2.9 (PMC6380879; doi:10.1167/19.2.9), 2019-02-19
Supplement: jovi-19-02-11_s03.pdf [file jovi-19-02-11_s03.pdf]

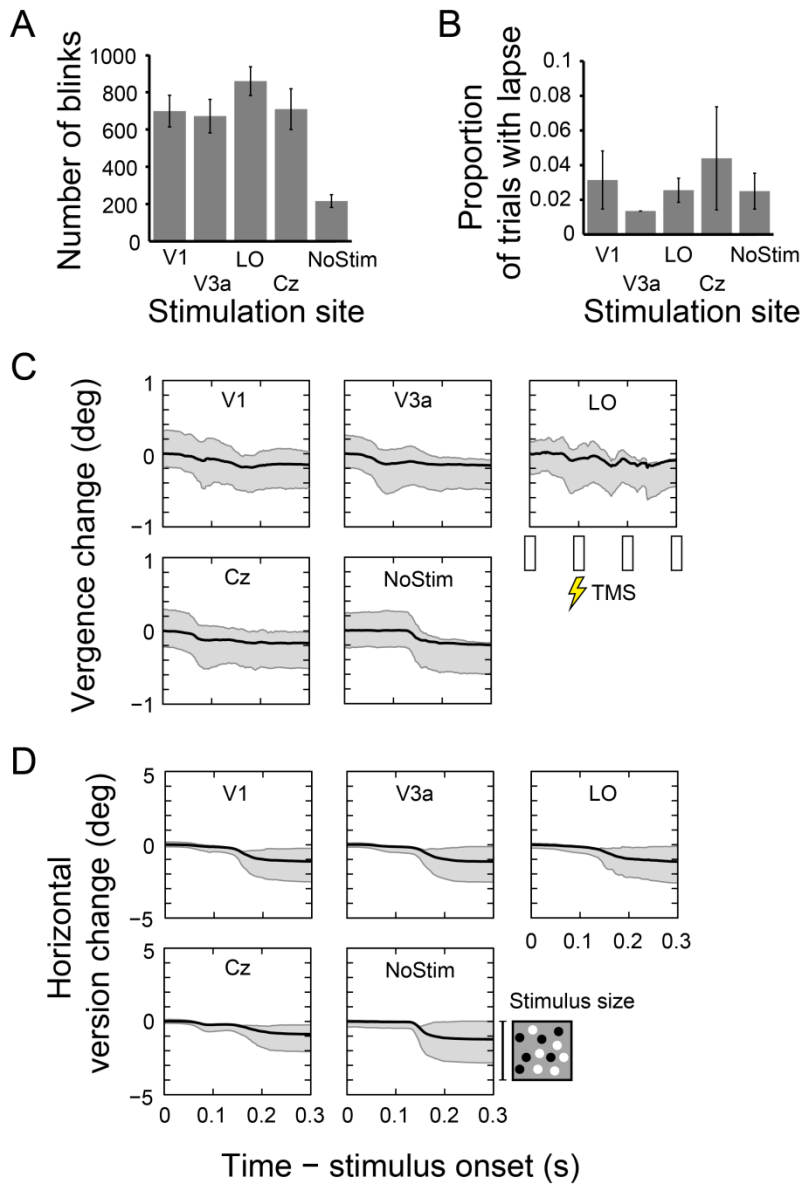

**Fig. S3** **A)** Number of blinks during stimulus presentation for different stimulation conditions. **B)** Proportion of trials in which participants missed stimulus presentation, based on lapse trials (step size 10/20',  $\sigma = 0'$ ). **C)** Vergence and **D)** horizontal version change during stimulus presentation. Shaded area shows 25-75 percentiles. White bars indicate the timing of TMS pulses during stimulus presentation.
